# Supplementary material
Source: Springer Nature journal article supplement (https://www.springermedizin.de/resource/supplementary/12967_2009_376_MOESM3_ESM.pdf/9576346)

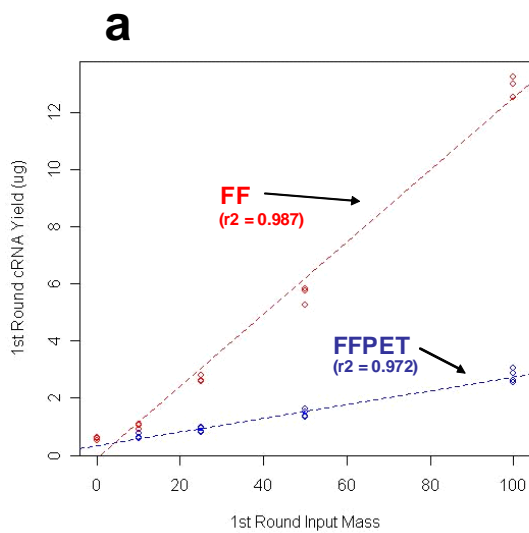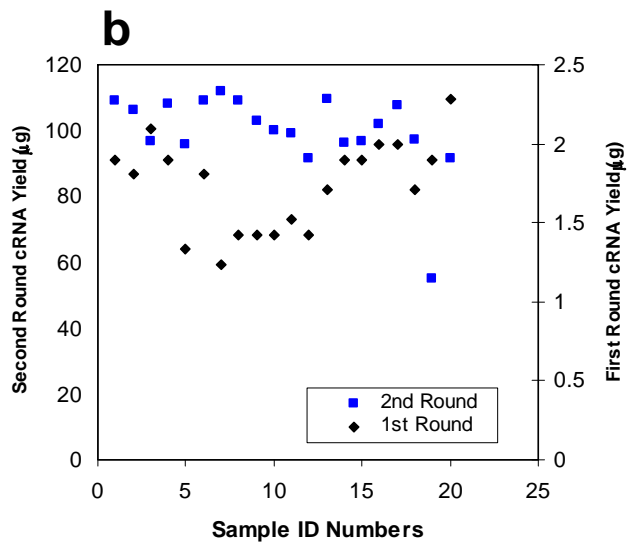

**c**

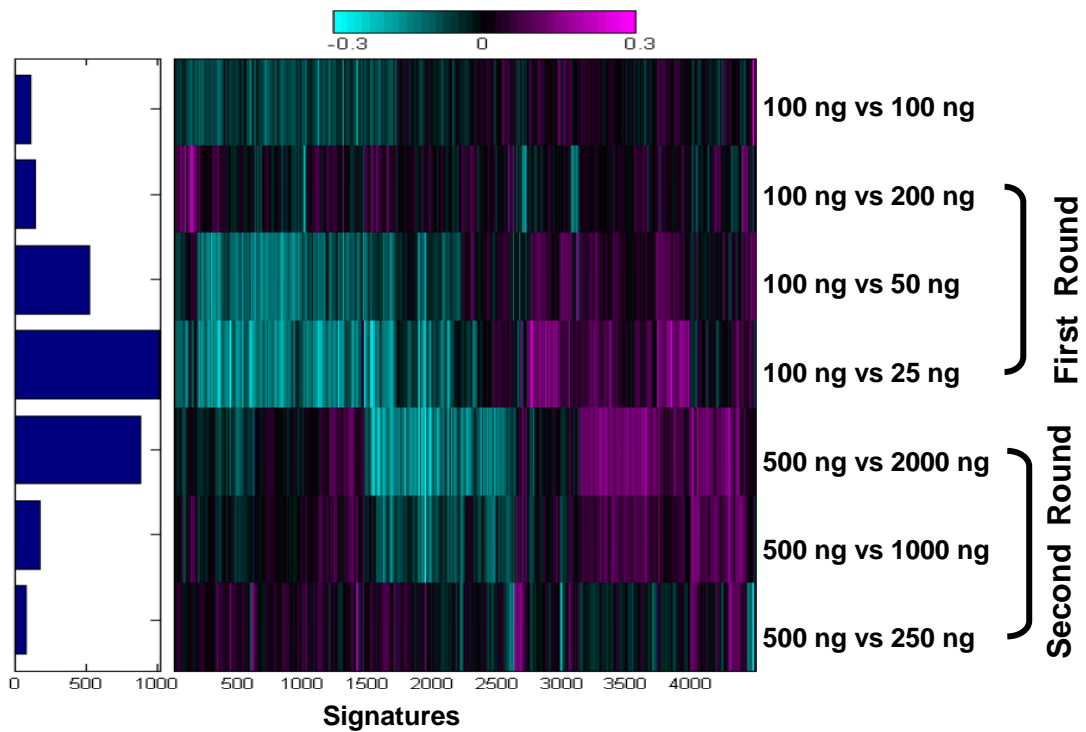

Supplement: MOESM3 [file 9576346]
